# Supplementary material for: Progressing participatory research with young people in India: how a Youth Advisory Board supported a large mental health project in Bengaluru
Source: Research Square preprint supplement (doi:10.21203/rs.3.rs-6138564/v1), 2025-03-26
Supplement: Supplementary file [file 3b035f58a30a42925ad89ecd.pdf]

## ADDITIONAL FILE

| Section and topic                   | Item                                                                                                                                      | Reported on page No |
|-------------------------------------|-------------------------------------------------------------------------------------------------------------------------------------------|---------------------|
| 1: Aim                              | Report the aim of PPI in the study                                                                                                        | 3                   |
| 2: Methods                          | Provide a clear description of the methods used for PPI in the study                                                                      | 7-15                |
| 3: Study results                    | Outcomes—Report the results of PPI in the study, including both positive and negative outcomes                                            | 16-25               |
| 4: Discussion and conclusions       | Outcomes—Comment on the extent to which PPI influenced the study overall. Describe positive and negative effects                          | 27                  |
| 5: Reflections/critical perspective | Comment critically on the study, reflecting on the things that went well and those that did not, so others can learn from this experience | 23-29               |
